# Supplementary material for: Solvent-free synthesis of new manganese phosphate–oxalate hybrid solids
Source: Royal Society of Chemistry journal article supplement (doi:10.1039/c3ce40457a), 2013-01-01
Supplement: c3ce40457a.pdf [file c3ce40457a.pdf]

# **Solvent-free synthesis of new manganese phosphate-oxalate hybrid solids**

Chunmei Duan,<sup>a</sup> Daibing Luo,<sup>b</sup> Rui Shang<sup>a</sup> and Zhien Lin<sup>\*a</sup>

<sup>a</sup> *College of Chemistry, Sichuan University, Chengdu 610064, P. R. China.*

<sup>b</sup> *Analytical & Testing Center, Sichuan University, Chengdu 610064, P. R. China*

\* To whom correspondence should be addressed. E-mail: [zhienlin@scu.edu.cn](mailto:zhienlin@scu.edu.cn)

### Physical measurements:

The thermogravimetric analyses were performed on a Mettler Toledo TGA/SDTA 851e analyzer in a flow of N<sub>2</sub> with a heating rate of 10 °C/min. IR spectra (KBr pellets) were recorded on an ABB Bomem MB 102 spectrometer. Powder X-ray diffraction (XRD) data were obtained using a Rigaku D/MAX-rA diffractometer with Cu-K $\alpha$  radiation ( $\lambda = 1.5418 \text{ \AA}$ ). The photoluminescent spectra were measured on a Perkin-Elmer LS 55 luminescence spectrometer equipped with a 450 W xenon lamp.

### Synthesis

**Synthesis of Mn(2,2'-bpy)(H<sub>2</sub>PO<sub>4</sub>)(C<sub>2</sub>O<sub>4</sub>)<sub>0.5</sub> (1):** A mixture of Mn(H<sub>2</sub>PO<sub>4</sub>)<sub>2</sub>·2H<sub>2</sub>O (0.569 g), H<sub>2</sub>C<sub>2</sub>O<sub>4</sub>·2H<sub>2</sub>O (0.378 g), and 2,2'-bipyridine (0.312 g) was sealed in a Teflon-lined stainless steel autoclave and heated at 150 °C for 7 d. The autoclave was subsequently allowed to cool to room temperature. Rod-like crystals were recovered by filtration, washed with distilled water, and finally dried at ambient temperature (15.3 % yield based on manganese).

**Synthesis of Mn(phen)(H<sub>2</sub>PO<sub>4</sub>)(C<sub>2</sub>O<sub>4</sub>)<sub>0.5</sub> (2):** A mixture of Mn(H<sub>2</sub>PO<sub>4</sub>)<sub>2</sub>·2H<sub>2</sub>O (0.569 g), H<sub>2</sub>C<sub>2</sub>O<sub>4</sub>·2H<sub>2</sub>O (0.504 g), and 1,10-phenanthroline·H<sub>2</sub>O (0.401 g) was sealed in a Teflon-lined stainless steel autoclave and heated at 150 °C for 14 d. The autoclave was subsequently allowed to cool to room temperature. Rod-like crystals were recovered by filtration, washed with distilled water, and finally dried at ambient temperature (52.4 % yield based on manganese).

**Synthesis of (4,4'-H<sub>2</sub>bpy)<sub>0.5</sub>·Mn(H<sub>2</sub>PO<sub>4</sub>)(C<sub>2</sub>O<sub>4</sub>) (3):** A mixture of Mn(H<sub>2</sub>PO<sub>4</sub>)<sub>2</sub>·2H<sub>2</sub>O (0.569 g), H<sub>2</sub>C<sub>2</sub>O<sub>4</sub>·2H<sub>2</sub>O (0.252 g), and 4,4'-bipyridine (0.312 g) was sealed in a

Teflon-lined stainless steel autoclave and heated at 150 °C for 14 d. The autoclave was subsequently allowed to cool to room temperature. Prism-like crystals were recovered by filtration, washed with distilled water, and finally dried at ambient temperature (30.3 % yield based on manganese).

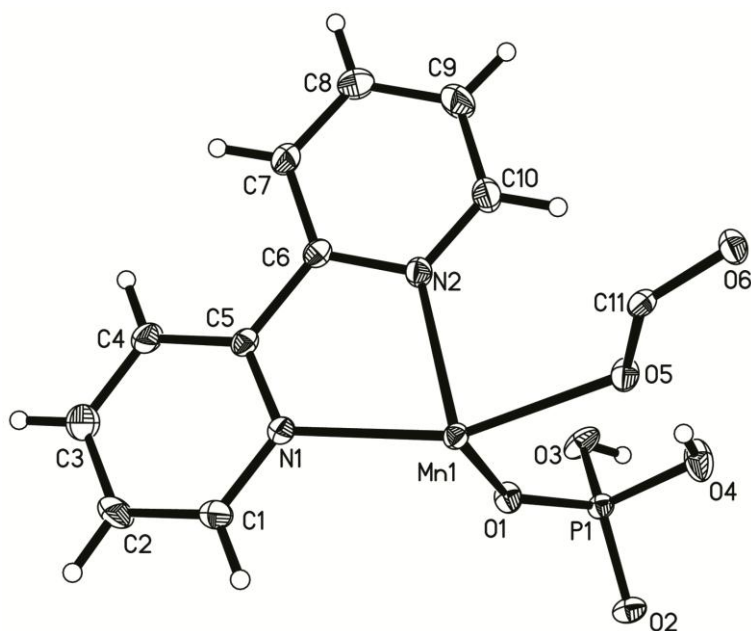

**Figure S1.** ORTEP plot of the asymmetric unit of compound **1**, showing the labeling scheme and the 30% probability displacement ellipsoid.

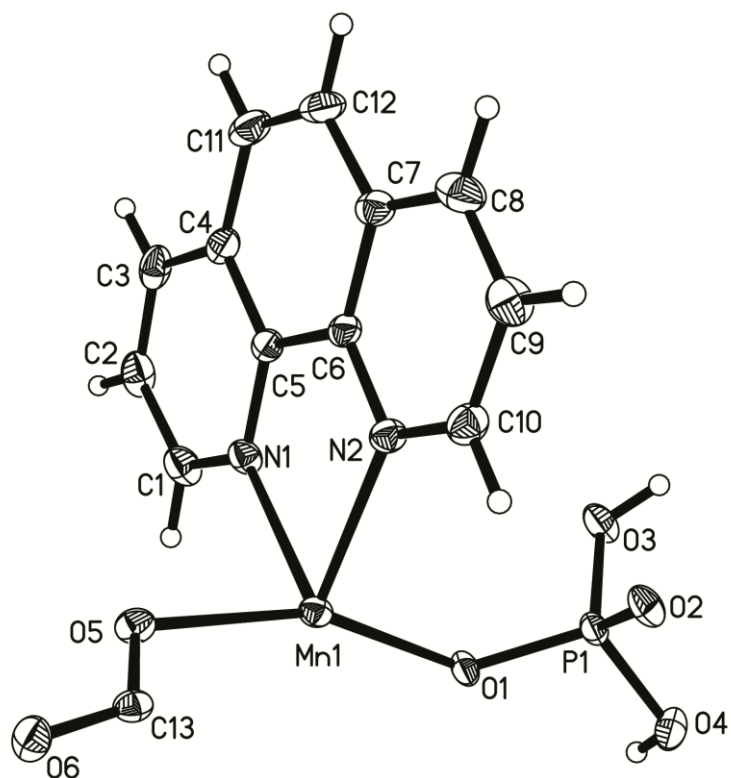

**Figure S2.** ORTEP plot of the asymmetric unit of compound **2**, showing the labeling scheme and the 30% probability displacement ellipsoid.

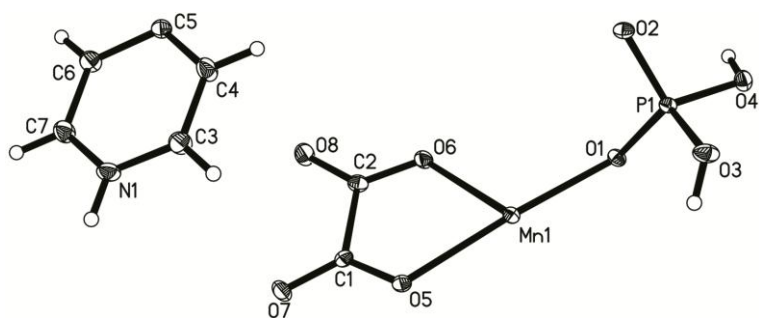

**Figure S3.** ORTEP plot of the asymmetric unit of compound **3**, showing the labeling scheme and the 30% probability displacement ellipsoid.

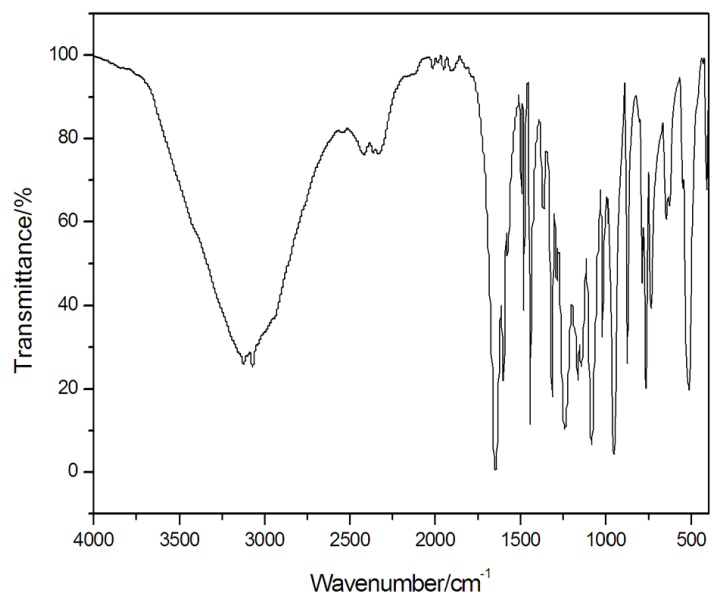

**Fig. S4.** IR spectrum of compound **1**.

FTIR data ( $\text{cm}^{-1}$ ): 3070 (s,  $\nu(\text{C-H})$ ), 1650 (vs,  $\nu(\text{C=O})$ ), 1480 (m,  $\delta(\text{C-H})$ ), 1440 (s,  $\nu(\text{C-C})$ ), 1310 (s,  $\nu(\text{C-O})$ ), 1240 (s,  $\nu(\text{C-N})$ ), 1080 (s,  $\nu_{\text{as}}(\text{P-O})$ ), 1020 (m,  $\nu_{\text{as}}(\text{P-O})$ ), 955 (s,  $\nu_{\text{as}}(\text{P-O})$ ), 876 (s,  $\nu_{\text{s}}(\text{P-O})$ ), 766 (s,  $\nu_{\text{s}}(\text{P-O})$ ), 513 (s,  $\delta(\text{P-O})$ )

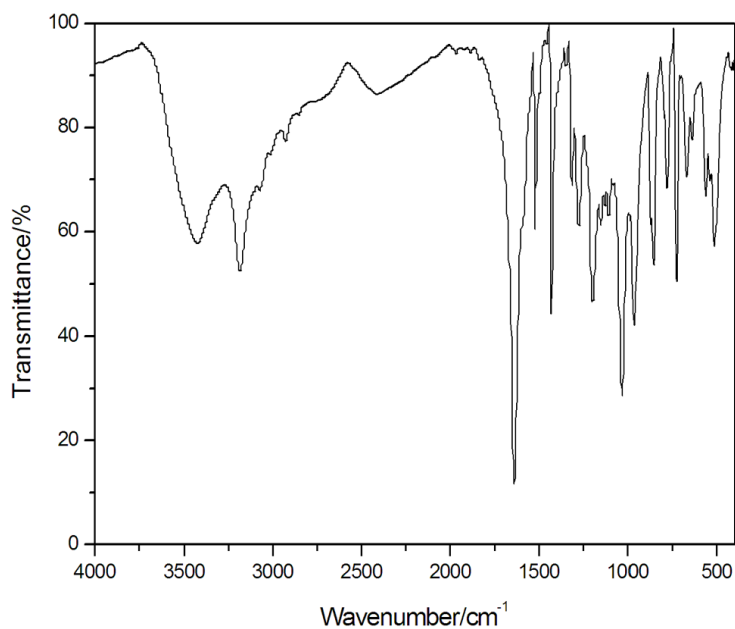

**Fig. S5.** IR spectrum of compound **2**.

FTIR data ( $\text{cm}^{-1}$ ): 3420 (m,  $\nu(\text{OH})$ ), 3180 ( $\nu(\text{C-H})$ ), 1640 (vs,  $\nu(\text{C=O})$ ), 1520 (m,  $\nu(\text{C-C})$ ), 1430 (s,  $\nu(\text{C-C})$ ), 1310 (m,  $\nu(\text{C-O})$ ), 1200 (m,  $\nu(\text{C-N})$ ), 1030 (s,  $\nu_{\text{as}}(\text{P-O})$ ), 964 (s,  $\nu_{\text{as}}(\text{P-O})$ ), 854 (s,  $\nu_{\text{s}}(\text{P-O})$ ), 781 (m,  $\nu_{\text{s}}(\text{P-O})$ ), 725 (s,  $\nu_{\text{s}}(\text{P-O})$ ), 515 (m,  $\delta(\text{P-O})$ )

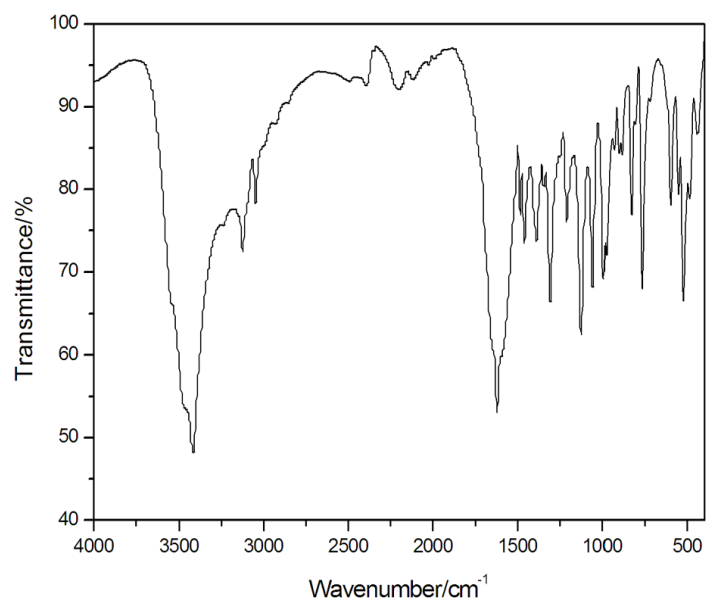

**Fig. S6.** IR spectrum of compound **3**.

FTIR data (cm<sup>-1</sup>): 3420 (vs,  $\nu$ (O-H)), 3120 (w,  $\nu$ (C-H)), 3050 (w,  $\nu$ (C-H)), 1620 (vs,  $\nu$ (C=O)), 1460 (m,  $\nu$ (C-C)), 1390 (m,  $\delta$ (C-H)), 1300 (m,  $\nu$ (C-O)), 1210 (w,  $\nu$ (C-N)), 1120 (s,  $\nu_{as}$ (P-O)), 1050 (m,  $\nu_{as}$ (P-O)), 995 (m,  $\nu_{as}$ (P-O)), 827 (m,  $\nu_s$ (P-O)), 766 (s,  $\nu_s$ (P-O)), 596 (m,  $\delta$ (P-O)), 523 (s,  $\delta$ (P-O))

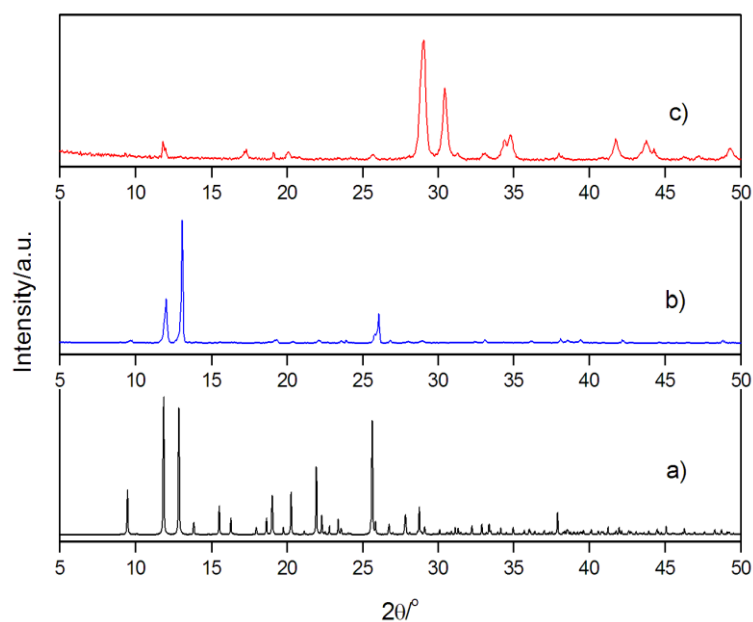

**Fig. S7.** (a) Simulated and (b) experimental powder XRD patterns of compound **1** and (c) the as-synthesized sample upon treatment at 700 °C for 1 h.

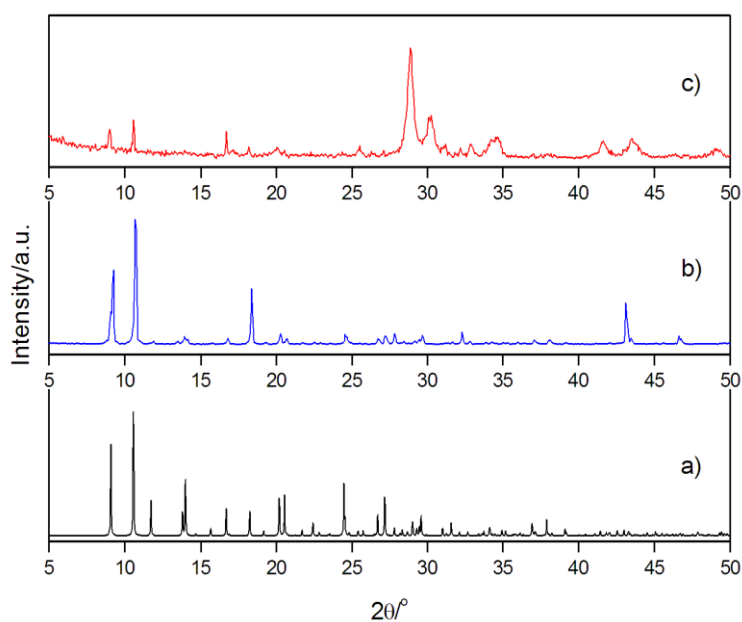

**Fig. S8.** (a) Simulated and (b) experimental powder XRD patterns of compound **2** and (c) the as-synthesized sample upon treatment at 700 °C for 1 h.

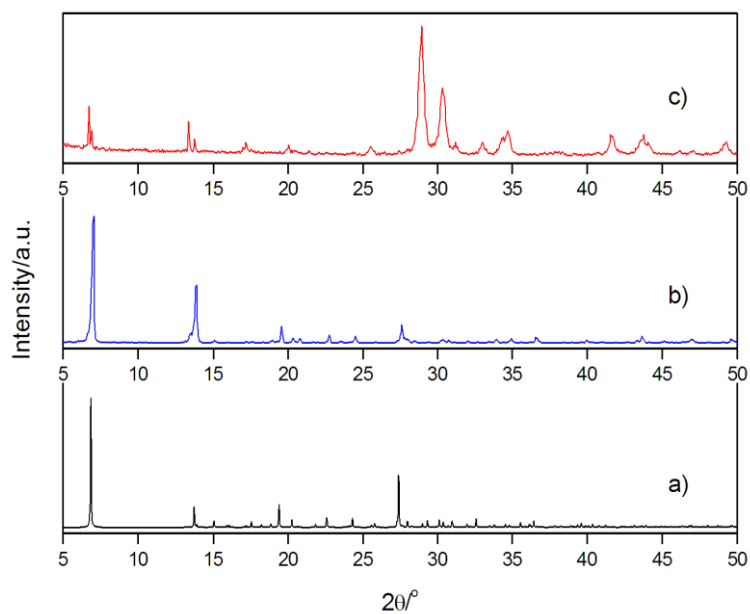

**Fig. S9.** (a) Simulated and (b) experimental powder XRD patterns of compound **3** and (c) the as-synthesized sample upon treatment at 700 °C for 1 h.

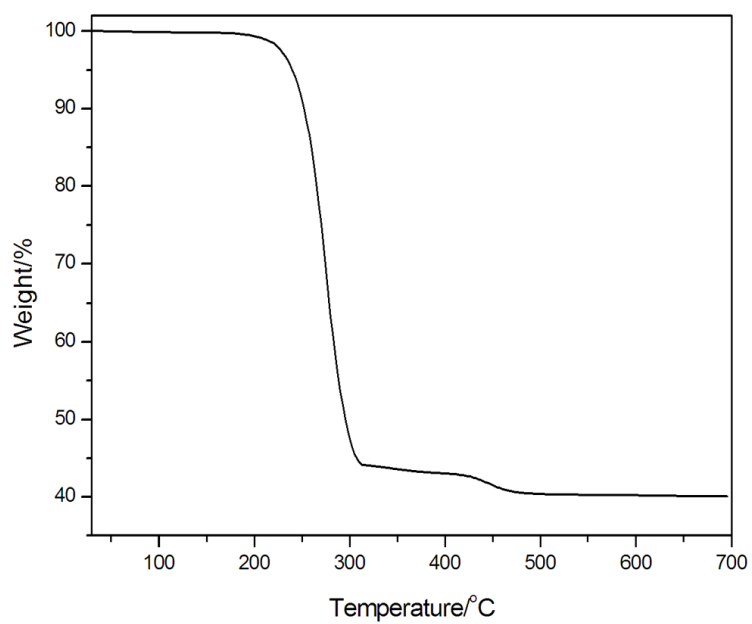

**Fig. S10.** TGA curve of compound **1** in a flow of air with a heating rate of 10 °C/min.

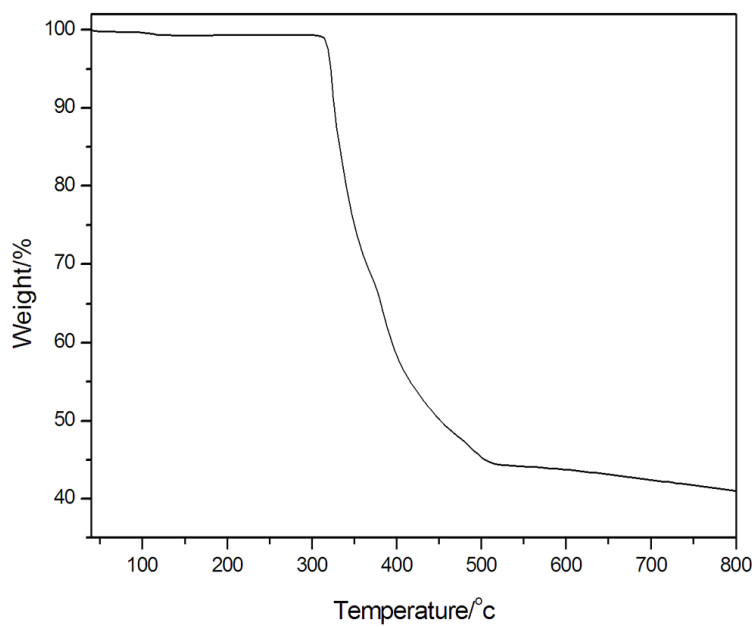

**Fig. S11.** TGA curve of compound **2** in a flow of air with a heating rate of 10 °C/min.



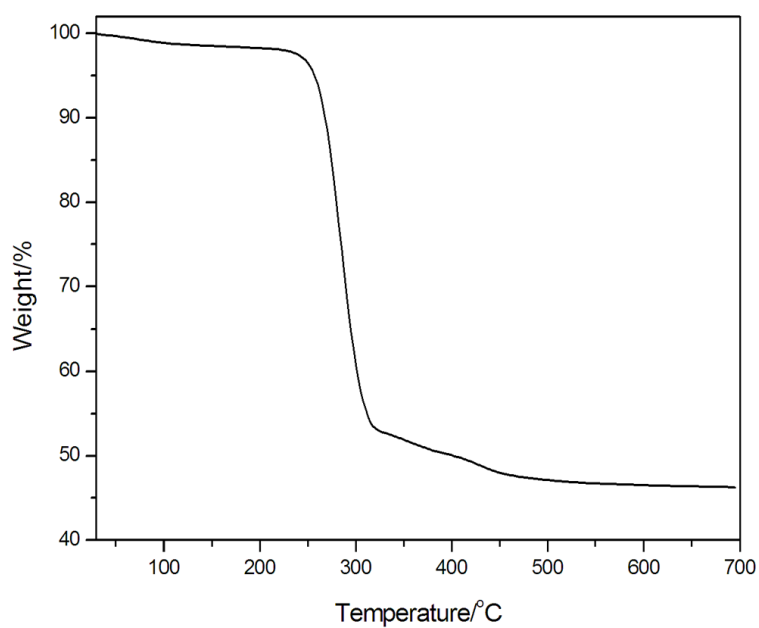

**Fig. S12.** TGA curve of compound **3** in a flow of air with a heating rate of 10 °C/min.

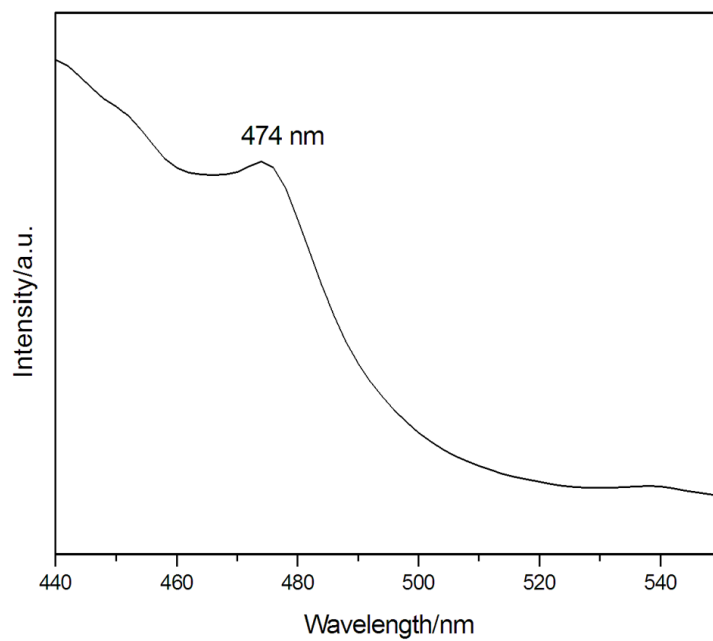

**Fig. S13.** Solid state photoluminescent spectrum of compound **1** at room temperature.

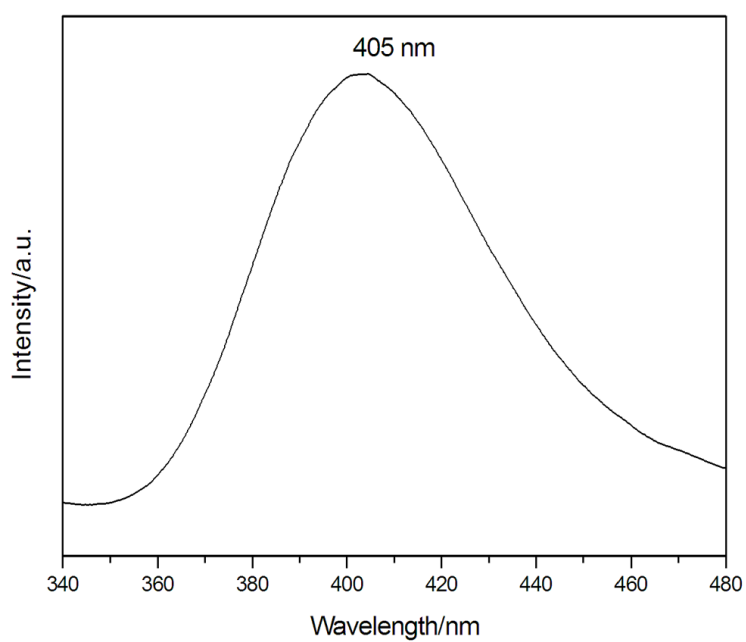

**Fig. S14.** Solid state photoluminescent spectrum of compound **2** at room temperature.

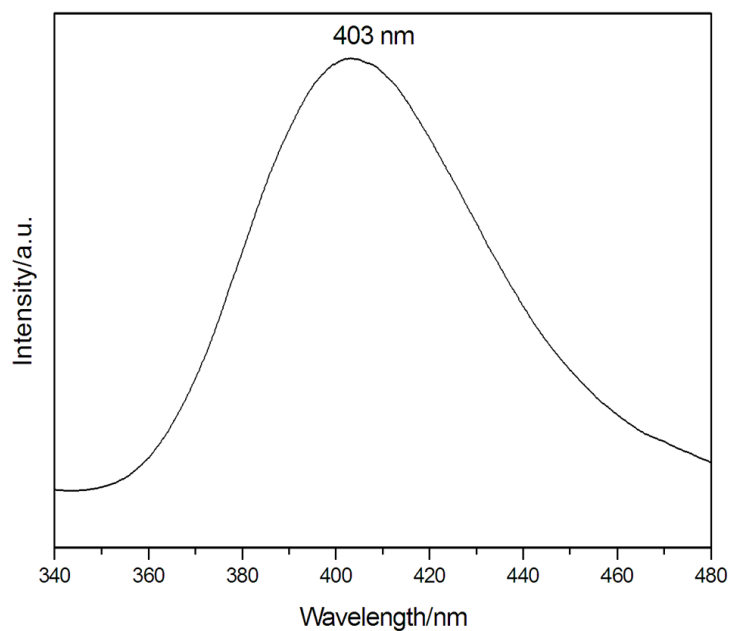

**Fig. S15.** Solid state photoluminescent spectrum of compound **3** at room temperature.

**Table 1.** Hydrogen bonds information for compounds **1-3**

| D-H...A <sup>a</sup> | d(D-H)(Å) | d(H...A)(Å) | d(D...A) (Å) | <(DHA) (deg) |
|----------------------|-----------|-------------|--------------|--------------|
| Compound <b>1</b>    |           |             |              |              |
| O3-H1...O2#1         | 0.82      | 1.87        | 2.674(3)     | 165.9        |
| O4-H2...O5           | 0.82      | 1.88        | 2.693(3)     | 171.6        |
| Compound <b>2</b>    |           |             |              |              |
| O3-H1...O2#2         | 0.82      | 1.71        | 2.524(2)     | 173.3        |
| O4-H2...O5#3         | 0.82      | 1.89        | 2.683(3)     | 161.8        |
| Compound <b>3</b>    |           |             |              |              |
| N1-H3...O8#4         | 0.86      | 1.81        | 2.666(3)     | 177.3        |

<sup>a</sup> Symmetry transformations used to generate equivalent atoms: #1 -x, -y+1, -z+1; #2 -x+1, -y+1, -z+1; #3 -x+1, -y, -z+1; #4 x-1, y, z.
